# Supplementary figures and images for: Global, regional and national burden of bladder cancer and its attributable risk factors in 204 countries and territories, 1990–2019: a systematic analysis for the Global Burden of Disease study 2019
Source: HighWire-hosted journal article supplement (doi:10.1136/bmjgh-2020-004128), 2021-11-01

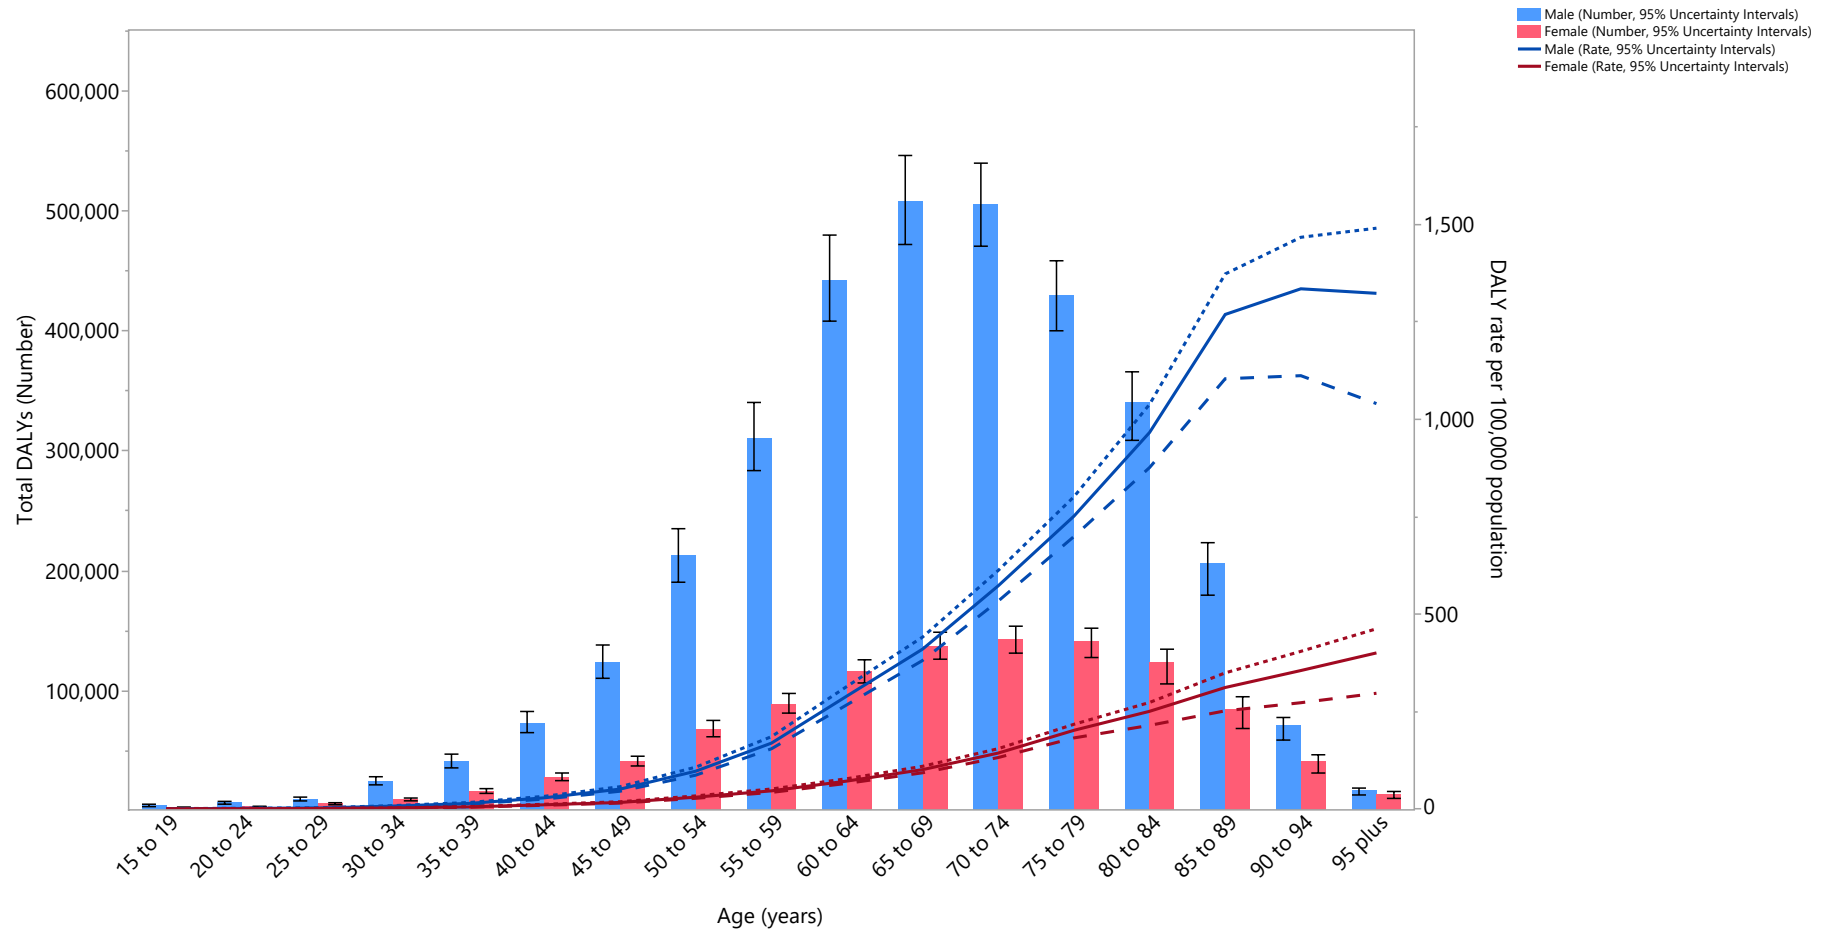

Supplement: bmjgh-2020-004128supp007_data_supplement.pdf [file bmjgh-2020-004128supp007_data_supplement.pdf]

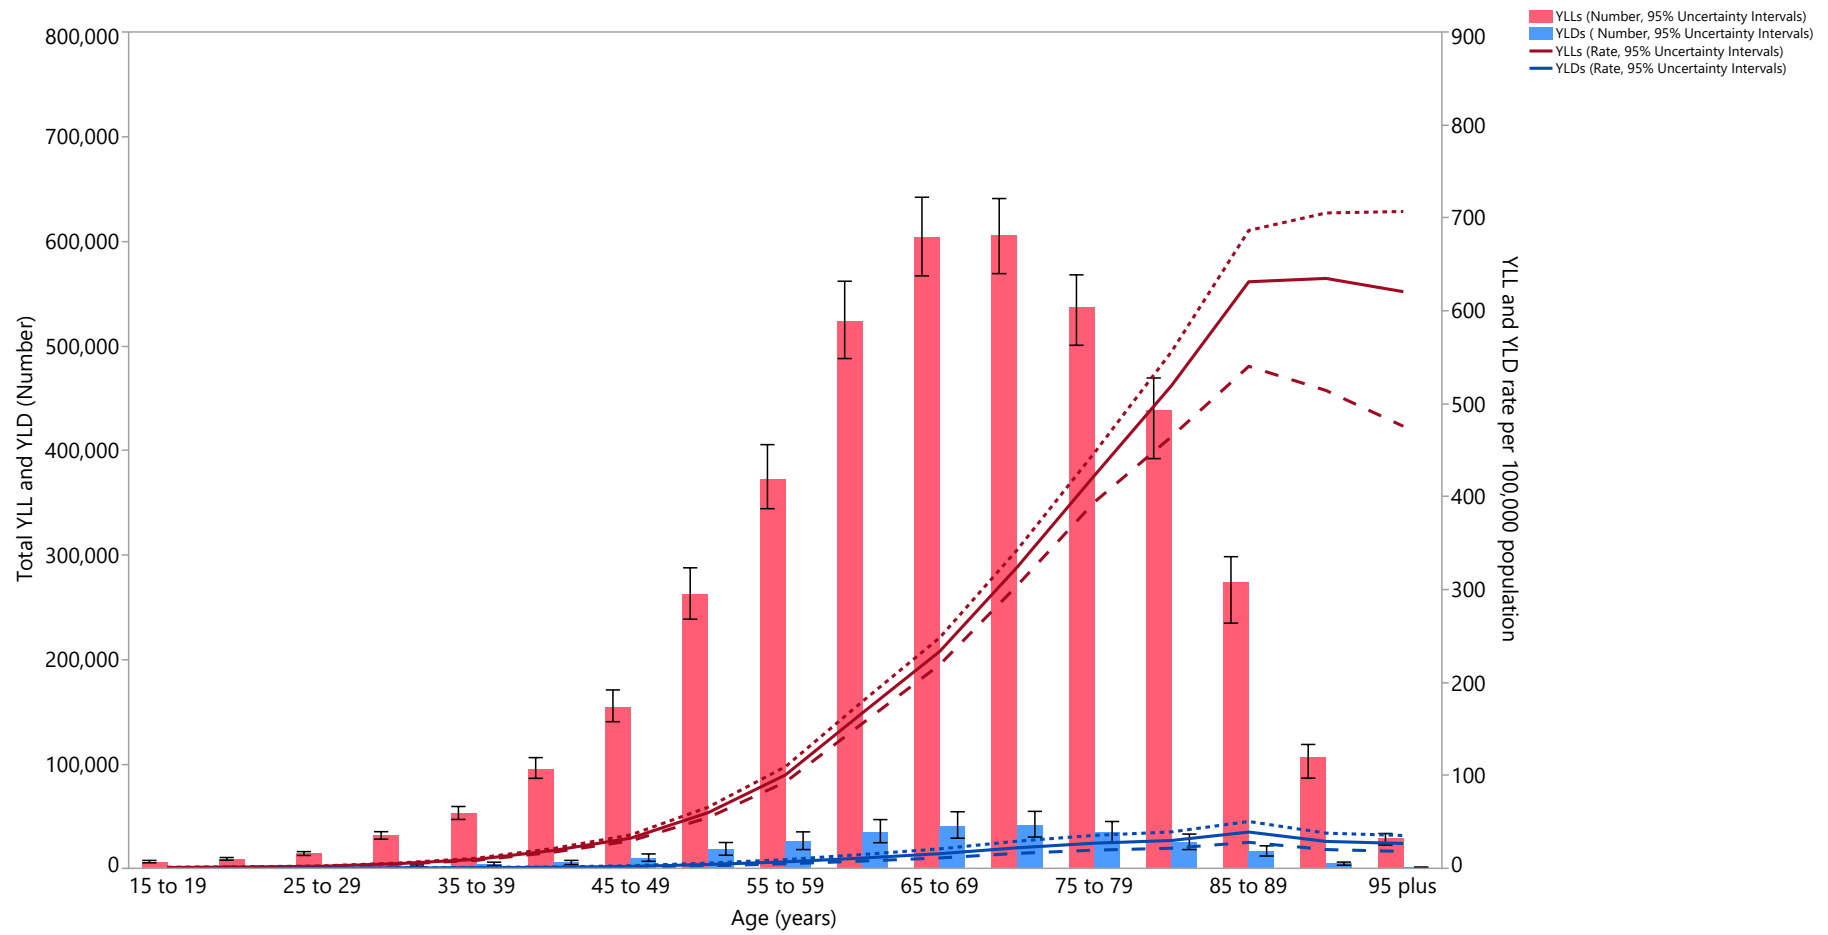

Supplement: bmjgh-2020-004128supp008_data_supplement.pdf [file bmjgh-2020-004128supp008_data_supplement.pdf]
